1 *In vitro* evaluation of grapevine endophytes, epiphytes and sap micro-organisms for potential use  
2 to control grapevine trunk disease pathogens.

3  
4 Robert Blundell<sup>a</sup>, Molly Arreguin<sup>a</sup> and Akif Eskalen<sup>\*a</sup>

5  
6 <sup>a</sup>Department of Plant Pathology, University of California Davis, One Shields Avenue, Davis, CA,  
7 95616-8751, USA; [aeskalen@ucdavis.edu](mailto:aeskalen@ucdavis.edu)

8  
9 \*Corresponding author: Email: [aeskalen@ucdavis.edu](mailto:aeskalen@ucdavis.edu)

10  
11 **Summary.** Grapevine trunk diseases (GTDs) threaten the economic sustainability of viticulture  
12 worldwide causing a significant reduction of both yields and quality of grapes. Biological control  
13 presents a promising sustainable alternative to cultural and chemical methods to mitigate the  
14 effects of pathogens causing GTDs, including *Botryosphaeria dieback*, *Eutypa dieback* and *Esca*.  
15 This study aimed to identify naturally occurring potential biological control agents from a variety  
16 of grapevine tissues, including sap, cane and pith and evaluate their antagonistic activity against  
17 selected fungal pathogens responsible for GTDs *in vitro*. Bacterial and fungal isolates were  
18 preliminary screened *in vitro* to determine their antifungal activity via a dual culture assay against  
19 *Neofusicoccum parvum* and *Eutypa lata*. Among the fungal isolates, *Trichoderma* spp. inhibited  
20 *E. lata* mycelial growth up to 64% and *N. parvum* mycelial growth up to 73% with overgrowth  
21 and stopped growth being the likely antagonistic mechanisms. Among the bacterial isolates,  
22 *Bacillus* spp. inhibited *E. lata* mycelial growth up to 20% and *N. parvum* mycelial growth up to  
23 40%. Select antagonistic isolates of *Trichoderma*, *Bacillus* and *Aureobasidium* spp. were subject  
24 to further dual culture antifungal analysis against *Diplodia seriata* and *Diaporthe ampelina*, with  
25 *Trichoderma* isolates consistently causing the greatest inhibition. Volatile organic compound  
26 antifungal analysis revealed that these *Trichoderma* isolates resulted significantly inhibited  
27 mycelial growth of *N. parvum*, *E. lata* and *D. ampelina* causing up to 20.11%, 60.55% and 70.9%  
28 inhibition respectively ( $P \leq 0.05$ ). Multilocus sequence analysis revealed that the *Trichoderma*  
29 isolates are most closely related to *Trichoderma asperellum* and *Trichoderma hamatum*. This study  
30 identifies grapevine sap as a novel source of potential biological control agents for control of GTDs  
31 to support existing efforts to control GTDs. Further testing will be necessary to fully characterize  
32 these microbes mode of antagonism and assess their efficacy for pruning wound protection *in*  
33 *planta*.

34  
35 **Keywords.** Biological control, Grapevine trunk diseases, Endophytes, Microbial antagonism,  
36 Antifungal

37  
38 Introduction

39 Fungal diseases are a major biotic threat to the future economic sustainability of table grapes and  
40 wine grapes worldwide. Grapevine trunk diseases (GTDs) are prevalent in most viticulture regions  
41 worldwide causing a significant reduction of both yields and quality of grapes, as well as increasing  
42 crop management costs for cultural and chemical preventative measures (Urbez-Torres *et al.*,  
43 2006; Gubler *et al.*, 2005; Siebert *et al.*, 2001; Bertsch *et al.*, 2013; Kaplan *et al.*, 2016). GTDs  
44 lead to premature decline and dieback of grapevine and are caused by a complex of several  
45 taxonomically unrelated groups of Ascomycete. *Botryosphaeria dieback*, also known as Black

46 Dead Arm or ‘Bot Canker’ is one of the most severe GTDs and is currently associated with 26  
47 botryosphaeriaceous taxa in the genera *Botryosphaeria*, *Diplodia*, *Dothiorella*, *Lapsiodiplodia*,  
48 *Neofusicoccum*, *Neoscytalidium*, *Phaeobotryosphaeria*, and *Spencermartinsia* (Pitt *et al.*, 2013;  
49 Urbez-Torres. 2011; Pitt *et al.*, 2015; Yang *et al.*, 2017; Rolshausen *et al.*, 2013). Another  
50 devastating GTDs is Eutypa dieback, caused by 24 species in the Diatrypaceae family with the  
51 most virulent and common being *Eutypa lata* (Luque *et al.*, 2014; Pitt *et al.*, 2013; Rolshausen *et*  
52 *al.*, 2014; Trouillas *et al.*, 2010). Esca and Phomopsis dieback also comprise the GTDs complex  
53 and are of worldwide economic importance (Munkvold *et al.*, 1994; Gubler *et al.*, 1995). GTDs  
54 can occur simultaneously in all grapevine producing areas though severity may differ among  
55 regions (Mugnai *et al.*, 1999; Pascoe and Cottrall, 2000; Halleen *et al.*, 2003; Gubler *et al.*, 2005).  
56 Characteristic symptoms of *Botryosphaeria* and *Eutypa* dieback are the formations of wedge-  
57 shaped cankers in infected trunks and cordons. From the infection site, which is often a pruning  
58 wound, the fungal pathogen will grow downwards occupying vascular elements as well as adjacent  
59 cells. When the affected vineyards are no longer economically sustainable to maintain, growers  
60 sadly face no alternative but to replant (Gramaje *et al.*, 2018). GTDs can also be found in dormant  
61 wood cuttings and young grafted plants and thus spread to grapevines during the plant propagation  
62 process (Aroca *et al.*, 2010; Gramaje and Armengol, 2011; Waite and Morton, 2007; Billones-  
63 Baaijens *et al.*, 2013).

64 Management of GTDs is difficult and influenced by the specific disease and/or pathogens involved  
65 but over the years a variety of preventative methods have been studied and implemented, including  
66 cultural practices such as double pruning and application of chemical fungicides (Bertsch *et al.*,  
67 2013). However, these methods are highly variable in efficacy, not environmentally sustainable  
68 and can be very costly (Zanzotto *et al.*, 2016). A promising new approach is the use of biological  
69 control agents (BCAs) to control pathogens causing GTDs. Biological control refers to the  
70 utilization of naturally occurring micro-organisms to suppress pests and pathogens (Martinez-Diz  
71 *et al.*, 2020; Heimpel and Mills, 2017). Grapevine, like perennial woody plants, can be colonized  
72 by an innumerable number of micro-organisms that can reside intercellularly or intracellularly  
73 within grapevine tissue and are called endophytes (Gilbert *et al.*, 2014; West *et al.*, 2010) or they  
74 can colonize the surface of grapevine organs, such as leaves and are called epiphytes (Bruissson *et*  
75 *al.*, 2019; Hardoim *et al.*, 2015). Endophytes have been shown to be a valuable source of potential  
76 BCAs as they are believed to be associated with all 300,000 plant species, most of them non-  
77 pathogenic bacteria or fungi that colonize plants asymptotically (Strobel and Daisy. 2003).  
78 Since the turn of the century, more than 40 BCAs have been isolated, identified and tested against  
79 the pathogens responsible for the GTDs complex and whilst the majority of cultured endophytes  
80 do not exhibit inhibitory activity, some *Trichoderma spp.* and *Bacillus spp.* have proved highly  
81 efficient in protecting pruning wounds against various GTDs pathogens *in vitro*, greenhouse and  
82 field trials (Mondello *et al.*, 2018; Di Marco *et al.*, 2002; 2004; John *et al.*, 2008; Halleen *et al.*,  
83 2010; Schmidt *et al.*, 2001; Kotze *et al.*, 2011; Rezgui *et al.*, 2016; Martinez-Diz *et al.*, 2020) and  
84 several successful efforts have been made to commercialize these species as BCAs (Otoguro and  
85 Suzuki, 2018). *Trichoderma spp.* can stimulate plant growth and suppress pathogens by direct  
86 competition for nutrients and space, exhibit mycoparasitism and antibiosis and induce systemic  
87 resistance (Harman. 2006; Mukherjee *et al.*, 2013; John *et al.*, 2005). *Bacillus spp.* can antagonize  
88 GTDs via antibiotic production, competition for nutrients and activation of the plant defense  
89 response (Cawoy *et al.*, 2011; Choudhary and Johri 2009).

91 To our knowledge, there have been no published reports evaluating grapevine sap inhabiting  
92 microbes for their antifungal activity against pathogens causing GTDs. The majority of  
93 antagonistic endophyte studies related to GTDs have sourced microbes from grapevine bark and  
94 roots. Thus, our study aimed to exploit this gap in the knowledge by isolating microbes from  
95 grapevine sap both immediately after making fresh pruning cuts as well as seven days later and  
96 evaluate for their antagonistic activity against a variety of pathogens responsible for GTDs *in vitro*.  
97 We also made isolations from other grapevine sources including pith and cane tissue.

## 98 99 Methods

### 100 101 *Isolation of potential biocontrol organisms from grapevine*

102  
103 All microbial sampling was performed at the University of California, Davis, Plant Pathology  
104 Fieldhouse Facility in Yolo County (38°31'24.1"N 121°45'43.3"W) from an 8-years old  
105 'Sauvignon blanc' vineyard in March 2019 prior to any standard pruning. A total of 10 randomly  
106 selected 'healthy' looking vines were used in this study with samples taken from four randomly  
107 pruned spurs per vine. For collection of sap exudate, the cut points of one-year old lignified spurs  
108 were sprayed with 70% ethanol for surface sterilization to avoid contamination, and once dry, a  
109 horizontal pruning cut was made with sterile pruning shears. A 100 µl sample of sap exudate was  
110 immediately collected from the bleeding wound with a pipette and stored on ice. A 20 µl aliquot  
111 of sap exudate from each spur was spread by a sterile glass rod onto potato dextrose agar amended  
112 with tetracycline at 100 mg/L (PDA-T) and nutrient agar (NA) plates. Growing fungal and  
113 bacterial cultures were sub-cultured for *in vitro* screening and molecular identification. Sampling  
114 for epiphytic microbes was performed by scraping dry sap from the pruning surface seven days  
115 after the initial cut from the same canes and plated as described above. After incubation at 25°C  
116 for roughly 7 days, sub-cultures of all growing microbes were made to fresh PDA-T and NA.

117  
118 Grapevine endophytes were also isolated in September 2019 from the same vineyard from  
119 untreated control canes used in a pruning wound protection trial. The canes were split  
120 longitudinally, and isolations were made from the exposed wood and pith tissues. A total of ten  
121 canes were used and three pieces of tissue and three pieces of pith were collected from each cane  
122 and plated on PDA-T and NA plates. Plates were incubated at 25 °C for roughly 7 days before  
123 subcultures of growing isolates were performed.

### 124 125 *Genomic DNA extraction*

126  
127 Genomic DNA was extracted by scraping fungal mycelium from 1 week old subcultures of isolates  
128 and added to a 2ml tube containing 300 µl of Nuclei Lysis Solution and 1mm diameter glass beads  
129 (bioSpec Products). Mycelium was homogenized for 40 seconds at 6 m/sec in a FastPrep-24™ 5G  
130 bead beating grinder and lysis system (MP Biomedicals). Genomic DNA was extracted using a  
131 DNA extraction kit (Wizard Genomic DNA Purification Kit; Promega Corp, Madison, WI).  
132 Genomic DNA was extracted from 1-week old bacterial sub cultures by collecting a loop of  
133 bacteria with a sterile pipette tip and inoculating a 0.2 ml PCR tube containing 15 µl of Molecular  
134 Grade Water and ran in a thermal cycler for 15 minutes at 95 °C.

### 135 *PCR amplification and sequencing of Fungal ITS, TEF-1a and β1-tubulin genes.*

136 The internal transcribed spacer (ITS) region of the ribosomal RNA (*rRNA*) gene was amplified  
137 using the primers, ITS1 and ITS4 (White *et al.*, 1990). The translation elongation factor 1 alpha  
138 gene (TEF-1a) was amplified using the primers, EF1-728F and EF1-968R (Carbone and Kohn,  
139 1999). The beta tubulin gene (*Bt*) was amplified using the primers, Bt2a and Bt2b (Glass and  
140 Donaldson. 1995).

#### 141 *PCR amplification and sequencing of Bacterial 16S rRNA, purH and rpoB genes.*

142 The 16S rRNA gene was amplified using the primers 16S U1 and 16S U2 (Lu *et al.*, 2000). The  
143 purine biosynthesis gene was amplified using the primers, purH-70f and purH-1013r (Rooney *et*  
144 *al.*, 2009). The RNA polymerase subunit B (*rpoB*) gene was amplified using the primers, rpoB-  
145 229f and rpoB-3354Rr (Rooney *et al.*, 2009).

146  
147 All PCR assays were performed in a final volume of 25  $\mu$ l in a reaction mixture containing 0 mM  
148 Tris-HCl (pH 8.8), 50 mM KCl, 3 mM MgCl<sub>2</sub>, 0.2 mM of each dNTP, 1.0  $\mu$ M of each primer and  
149 1 unit of Go Taq polymerase, Promega Corp., Madison, WI. Primers and excess nucleotides were  
150 removed from the amplified DNA using a PCR clean-up kit (EXO SAP). New England BioLabs  
151 and DNA was quantified using a QuantiFluor dsDNA System, Promega Corp., Madison, WI.  
152 Purified PCR samples were sent to Quintarabio, Hayward, CA for Sanger Sequencing. Sequence  
153 chromatograms were analyzed, and the sequences were assembled using Sequencher version 5.4.6.  
154 Alignment was performed with Clustal W. Phylogenetic analysis was performed with Mega X  
155 using the Maximum composite likelihood model for estimating genetic differences. A  
156 phylogenetic tree was obtained using the neighbor-joining method with 1000 bootstrap replicates.

#### 157 158 *Dual culture assay*

159  
160 All fungal and bacterial isolates were tested in an initial *in vitro* dual culture assay against the  
161 GTDs, *N. parvum* and *E. lata*. Fresh subcultures were made from each isolate and incubated at  
162 25°C for 1 week on PDA-T plates for fungal isolates and PDA plates for bacterial isolates for the  
163 assay. A 5mm diameter plug from each isolate was then placed 1cm from the edge of a 100 x  
164 15mm plate and a 5 mm diameter plug of 1 week old *N. parvum* or *E. lata* was placed 1cm from  
165 the opposite edge of the plate. Plates with only the pathogen served as controls. *N. parvum* assays  
166 were incubated at 25°C for 4 days before the percentage of pathogen inhibition was recorded  
167 whereas *E. lata* assays were incubated at 25°C for 14 days before being recorded. The percentage  
168 of inhibition of pathogen mycelial growth was calculated using the formula reported by Idris *et al.*  
169 (2007): % inhibition = [(C-T)/C] x 100 where C is the radius in mm of the pathogen when plated  
170 by itself and T is the radius of the pathogen when plated with an isolate. There was a total of 10  
171 replicates per isolate. Representative isolates from each genus isolated exhibiting potential  
172 biological control ability against *N. parvum* and *E. lata* were subsequently tested against the GTD  
173 pathogens, *Diplodia seriata* and *Diaporthe ampelina* using the same assay.

#### 174 175 *Volatile assay*

176  
177 The production of antifungal volatile organic compounds (VOCs) was assessed using the two-  
178 sealed-base-plates method described in Gotor-Vila *et al.*, (2017) with modifications. 100 x 15mm  
179 petri dishes were half filled with PDA-T or PDA and a 5mm diameter mycelial plug of 1 week old

180 isolates were placed in the center of a base plate. A 5mm diameter mycelial plug of a pathogen  
181 was placed in the center of another base plate and the two base plates were immediately sealed  
182 together using parafilm. Plates with only the pathogen served as controls. *N. parvum* and *D. seriata*  
183 assays were incubated at 25°C for 4 days before percentage of pathogen inhibition was recorded  
184 whereas *E. lata* and *D. ampelina* assays were incubated at 25°C for 14 days. The percentage of  
185 inhibition of pathogen mycelial growth was calculated using the formula reported by Idris *et al.*,  
186 (2007) as mentioned above. There was a total of 10 replicates per isolate tested.

187

### 188 *Statistical analyses*

189

190 Data obtained from the dual culture assay was analyzed by one-way ANOVA and means were  
191 separated by the post-hoc Dunnett's test at a 0.05 significance level.

192

### 193 *Results*

194

#### 195 *Isolation and ITS/16S sequencing of all potential biocontrol organisms from grapevine*

196

197 In total, eleven fungal isolates and two bacterial isolates were cultured on growth media from all  
198 grapevine 'structures' sampled (Table 1). The majority of isolates were obtained from either  
199 grapevine cane tissue or sap collected immediately after pruning cuts were made. Only two isolates  
200 were obtained from sap seven days after pruning and one isolate was obtained from grapevine pith.  
201 PCR amplification of the ITS gene, sequencing and BLAST revealed that nine of the fungal  
202 isolates were members of the *Aureobasidium* genus and two were members of the *Trichoderma*  
203 genus (Table 1). PCR amplification of the 16S rRNA, sequencing and BLAST revealed that the  
204 two bacterial isolates were members of the *Bacillus* genus (Table 1).

205

#### 206 *Preliminary screening – Dual culture assay (N. parvum and E. lata)*

207

208 The antagonistic potential of all subcultured bacterial and fungal isolates (Table 1) was initially  
209 evaluated against the GTDs pathogens *N. parvum* and *E. lata in vitro* using a dual culture assay.  
210 Whilst the majority of isolates showed no significant inhibition of *N. parvum* mycelial growth, the  
211 two bacterial isolates (*Bacillus* spp.), UCD 8745 and UCD 8347 and the two *Trichoderma* isolates,  
212 UCD 8368 and UCD 8717 caused a significant inhibition of *N. parvum* mycelial growth, ranging  
213 from 35% to 64.4% (Fig. 1A,  $P \leq 0.05$ ) compared to the *N. parvum* control. When the isolates were  
214 tested for antagonistic potential against *E. lata*, only the *Trichoderma* isolates, UCD 8368 and  
215 UCD 8717 were able to cause significant inhibition of *E. lata* radial mycelial growth, both resulting  
216 in excess of 65% mycelial inhibition compared to the control (Fig. 1B,  $P \leq 0.05$ ).

217

#### 218 *Dual culture assay (D. seriata and D. ampelina)*

219

220 The *Trichoderma* isolates, UCD 8368 and UCD 8717 and *Bacillus* isolates, UCD 8745 and UCD  
221 8347 were taken forward for further dual culture analysis as were the *Aureobasidium* isolates,  
222 UCD 8189 and UCD 8344 so that each genus of microorganisms isolated were evaluated. The  
223 antagonistic potential of these isolates were next evaluated against the GTDs pathogens *D. seriata*  
224 and *D. ampelina* using the same dual culture assay as mentioned above. All isolates caused a  
225 significant inhibition of *D. seriata* radial mycelial growth, ranging from 15.23% to 50.2% (Fig.



226 2A,  $P \leq 0.05$ ) compared to the control. Both *Trichoderma* isolates caused the greatest radial  
227 inhibition at roughly 50% compared to the control. There was variation between the *Bacillus*  
228 isolates as UCD 8347 caused roughly 32% radial inhibition whilst UCD 8745 only caused roughly  
229 11% radial inhibition. The *Aureobasidium* isolates, UCD 8189 and UCD 8344 were similar in their  
230 antagonistic activity, causing roughly 15% and 17% radial inhibition respectively. When the  
231 isolates were tested against the GTDs pathogen, *D. ampelina*, the *Trichoderma* isolates, UCD 8368  
232 and UCD 8717 caused the greatest inhibition, in excess of 80%. The *Bacillus* isolate UCD 8347  
233 also significantly reduced mycelial radial growth of *D. ampelina*, though to a much lesser extent  
234 (Fig. 2B,  $P \leq 0.05$  and Fig. 3).

235

#### 236 *Volatile organic compound (VOC) assay*

237

238 When the isolates were screened for antagonistic activity via production of antifungal volatile  
239 organic compounds (VOCs) against *N. parvum*, only the *Bacillus* isolate, UCD 8347 and  
240 *Trichoderma* isolate, UCD 8368 caused significant inhibition of *N. parvum*, causing roughly 10%  
241 and 20% radial inhibition respectively (Fig. 4A,  $P \leq 0.05$ ). When the isolates were tested against *E.*  
242 *lata*, all but the *Aureobasidium* isolates were capable of causing significant radial inhibition. The  
243 *Trichoderma* isolates, UCD 8368 and UCD 8717 isolates exhibited the greatest VOC effect, both  
244 causing at least 50% radial inhibition, whilst the *Bacillus* isolates, UCD 8745 and UCD 8347  
245 isolates caused roughly 37% and 39% radial inhibition respectively (Fig. 4B,  $P \leq 0.05$ ). No isolates  
246 exhibited any VOC mediated significant inhibition of *D. seriata* (Fig. 7C). However, against *D.*  
247 *ampelina*, all isolates exhibited VOC mediated significant inhibition with UCD 8717 causing  
248 roughly 70% inhibition. The other *Trichoderma* isolate, UCD 8368 caused roughly 40% inhibition,  
249 whilst the *Bacillus* isolates, UCD 8745 and UCD 8347 and *Aureobasidium* isolates, UCD 8189  
250 and UCD 8344 all caused roughly 20% inhibition (Fig. 4D,  $P \leq 0.05$  and Fig. 5).

251

#### 252 *Multilocus phylogenetic analysis of antagonistic isolates*

253

254 Multilocus phylogenetic analysis of the *ITS* and  $\beta 1$ -*tubulin* gene via maximum parsimony revealed  
255 that the isolates, UCD 8344 and UCD 8189 were most closely related to *Aureobasidium pullulans*  
256 (Figure 6). Multilocus phylogenetic analysis of the *purH* and *rpoB* gene via maximum parsimony  
257 revealed that the isolates, UCD 8347 and UCD 8745 were most closely related to *Bacillus*  
258 *velezensis* (Figure 7). Multilocus phylogenetic analysis of the *ITS* and *TEF-1a* gene via maximum  
259 parsimony revealed that the isolates, UCD 8368 and UCD 8717 were most closely related to  
260 *Trichoderma asperellum* and *Trichoderma hamatum* respectively (Fig. 8).

261

#### 262 Discussion

263 Grapevine pruning wound protection has historically been mediated by synthetic chemicals which  
264 have dominated the crop protection industry dating back to the 1980s. However, the longevity of  
265 crop production requires a greater shift towards sustainable practices so there is great interest in  
266 novel solutions to prevent and control grapevine trunk diseases (GTDs) (Mondello and Songy.  
267 2018). Biological control agents (BCAs) including *Trichoderma spp.* and *Bacillus spp.* have been  
268 demonstrated to have excellent potential for pruning wound protection against infection from  
269 GTDs *in vitro* (Di Marco *et al.*, 2002, 2004; John *et al.*, 2008; Halleen *et al.*, 2010; Schmidt *et al.*,  
270 2001; Kotze *et al.*, 2011; Rezgui *et al.*, 2016). Microbial inhabitants of nutrient rich grapevine sap

271 have not been evaluated for BCA ability against GTDs, so along with isolations from grapevine  
272 pith and cane tissue, we evaluated isolated microbes against the selected GTDs fungal pathogens,  
273 *Neofusicoccum parvum*, *Eutypa lata*, *Diplodia seriata* and *Diaporthe ampelina* *in vitro*.

274 *In vitro* dual culture assays are the primary means to detect antagonistic activity of microorganisms  
275 (Di Marco *et al.*, 2002; Haidar *et al.*, 2016). Both *Trichoderma* isolates UCD 8368 and UCD 8717  
276 in this study exhibited significant mycelial inhibition against all pathogens in dual culture assays,  
277 exhibiting at least 75% mycelial inhibition against the slow growing pathogens, *E. lata* and *D.*  
278 *ampelina* (Fig. 1B and 2B). UCD 8368, which is most closely related to *T. harzianum* (Fig. 8) was  
279 also shown to be effective in a similar *in vitro* study at inhibiting *E. lata* radial growth (Úrbez-  
280 Torres *et al.*, 2020). Whilst *Trichoderma spp.* possess various antifungal mechanisms, this  
281 mycelial inhibition can be likely attributed to overgrowth (Kotze *et al.*, 2011) as they grew  
282 considerably faster and surrounded the pathogens in dual culture (Figure 3). These findings have  
283 been backed up by similar studies where various *Trichoderma spp.* have been subject to dual  
284 culture assays against *N. parvum*, *D. seriata* and *E. lata* (Mutawila *et al.*, 2015; Silva-Valderrama  
285 *et al.*, 2020; Úrbez-Torres *et al.*, 2020). For example, *Trichoderma* isolates from Southern Italy  
286 were able to inhibit *N. parvum* radial growth by up to 74.3% (Úrbez-Torres *et al.*, 2020). It is  
287 hypothesized that this observed overgrowth by *Trichoderma spp.* translates to competition for  
288 space and nutrients in grapevine pruning wounds and therefore a mechanism to protect against  
289 GTDs (Úrbez-Torres *et al.*, 2020).

290 However, in the volatile assay, UCD 8368 and UCD 8717 were still able to cause significant  
291 inhibition of *E. lata* and *D. ampelina* (Figures 4B and D) which is most likely due to the ability of  
292 *Trichoderma spp.* to produce volatile and non-volatile substances which have been shown to  
293 inhibit a range of fungi (John *et al.*, 2004; Kucuk and Kivanc, 2004; Kexiang *et al.*, 2002; Dennis  
294 and Webster, 1971a; Ghisalberti and Sivasithamparam, 1991; Chambers and Scott, 1995). John *et*  
295 *al.*, (2004) showed that volatile compounds synthesized by *T. harzianum* AG1, AG2, and AG3  
296 were able to inhibit growth of *E. lata* compared to a control and *E. lata* growth was completely  
297 inhibited by non-volatile compounds. In this study UCD-8368 and UCD 8717 elicited a coconut  
298 odor (detectable via smelling) which has previously been characterized as 6-n-pentyl-2H- pyran-  
299 2-one (Claydon *et al.*, 1987), and reported to inhibit fungi such as *Rhizoctonia solani*. The  
300 significant mycelial inhibition of *N. parvum* and *D. seriata* by UCD 8368 and UCD 8717 in the  
301 dual culture assay can likely be attributed to stopped growth, a term which describes when  
302 microorganism and pathogen grow until they came in contact with one another, whereafter growth  
303 of both organisms ceases (Kotze *et al.*, 2011) (Fig. 1A, 2A and 3). This mechanism as the primary  
304 method of inhibition can be supported in the volatile assay because there was no inhibition of *N.*  
305 *parvum* and *D. seriata* by UCD 8368 and UCD 8717 (Fig. 4A, C and Figure 5). The mycoparasitic  
306 reactions such as coiling, adhesion and penetration of pathogenic hyphae (Almeida *et al.*, 2007),  
307 have been shown to coincide with the physical contact interactions; overgrowth and stopped  
308 growth. With UCD 8717 being isolated from grapevine sap, this is to our knowledge the first report  
309 of a grapevine sap inhabiting microbe showing promising BCA ability against GTDs *in vitro*. In a  
310 recent study, Deyett and Rolshausen (2019) utilized a culture-independent amplicon metagenomic  
311 approach to characterize the major bacterial and fungal taxa that comprise grapevine xylem sap  
312 microbial communities, revealing that the core microbiome consisted of seven bacterial and five  
313 fungal taxa. Grapevine sap is a rich source of glucose, fructose and amino acids, especially in  
314 spring when nutrients are remobilized to the vegetative parts of the grapevine following winter

315 dormancy and is thus a conducive environment to harbor beneficial microbes (Deyett and  
316 Rolshausen, 2019).

317 The bacterial isolates (*Bacillus* spp.) UCD 8347 and UCD 8745 exhibited varying antifungal  
318 ability and mechanisms of antifungal ability in this study depending on the GTDs fungal pathogen.  
319 In the dual culture assay between UCD 8347 and *E. lata*, a zone of inhibition was observed (Fig.  
320 3). Inhibition zones are most likely indicative of antibiotic production (Kotze, 2004), a mechanism  
321 of mycoparasitism. Ferreira *et al.*, (1991) identified at least two *Bacillus* produced antibiotic  
322 substances that were responsible for the inhibition of mycelial growth and ascospore germination.  
323 In a recent study, Kotze, (2008) dual incubated (*in vitro*) *E. lata* with the same isolate and showed  
324 that *E. lata* displayed little mycelial growth and a clear inhibition zone between the cultures.  
325 Malformation of the hyphae, specifically swelling, was observed at a microscopic level. Another  
326 study by Kotze, (2011) showed that a *Bacillus subtilis* isolate exhibited a clear zone of inhibition  
327 against *Phomopsis viticola*. In the volatile assay, isolate UCD 8347 caused significant inhibition  
328 against *E. lata* suggesting that the antibiotic substance may be a volatile product. Isolate UCD  
329 8347 also exhibited a small zone of inhibition against *N. parvum* in the dual culture assay (Fig. 3)  
330 and it could also significantly inhibit *N. parvum* growth, albeit by only 10% in the volatile assay  
331 indicating the antibiotic substance may be a volatile product (Fig. 4A). Isolate UCD 8347 also  
332 exhibited significant inhibition of *D. seriata* and *D. ampelina* in the dual culture assay (Fig. 2A  
333 and B) and *D. ampelina* in the volatile assay (Fig. 4D) but the mechanism of inhibition is unclear.  
334 Isolate UCD 8745 had similar results to UCD 8347 albeit with less inhibition in some assays and  
335 the mechanism of inhibition is not as clear. It may be prudent in subsequent studies to investigate  
336 the VOC profile of these isolates.

337 Studies of the grapevine microbiome show that *Aureobasidium pullulans* is commonly distributed  
338 in grapevine, both in below and above ground structures (Sabate *et al.*, 2002; Martini *et al.*, 2009;  
339 Grube *et al.*, 2011; Barata *et al.*, 2012; Pinto *et al.*, 2014) and therefore, *A. pullulans* is an attractive  
340 micro-organism for investigating BCA potential. In this study, the *Aureobasidium* isolates UCD  
341 8344 and UCD 8189, whilst possessing no antagonistic ability against *N. parvum*, *E. lata* and *D.*  
342 *ampelina* in the dual culture assay, were able to cause significant mycelial inhibition of *D. seriata*  
343 in dual culture (Fig. 2A). This is likely due to stopped growth as they had no inhibitory effect  
344 against *D. seriata* in the volatile assay (Fig. 4C). Similar results were obtained in a study by Pinto  
345 *et al.*, (2018), where *A. pullulans* strain Fito\_F278 was able to significantly reduce the mycelial  
346 growth of *D. seriata* F98.1 in a dual culture assay and was also postulated to be as a result of  
347 stopped growth.

348 Although several different types of microorganisms were tested in this study, currently only  
349 *Trichoderma* spp. have been shown to be the most suitable agent for biological control of GTDs.  
350 The reason for this supremacy probably stems from the synergistic action of *Trichoderma* spp.  
351 various biocontrol mechanisms, in their ecological characteristics (saprotrophic, endophytic) and  
352 in the positive effects induced in their host plants. Considering that grapevines accommodate a  
353 large pool of resident microorganisms embedded in a complex micro-ecosystem (Pinto and  
354 Gomes, 2016), further attempts should be made to identify novel strains of *Trichoderma* and other  
355 microorganisms promoting advances in management of GTDs.



356 With the imperative need to make future agricultural practices as sustainable as possible we need  
357 novel solutions to control GTDs thus yielding high quality grapes that comply with the high  
358 standards of food safety. Whilst BCA efficacy *in vitro* does not always translate to efficacy *in*  
359 *planta*, they are at present the most promising, sustainable option for grapevine growers based on  
360 the restrictions and concerns of using chemical fungicides. This study has identified potential  
361 BCAs with great potential for simultaneous control of economically important pathogens  
362 responsible for GTDs and warrants further studies to characterize their modes of antagonism and  
363 evaluate their efficacy in field trials. There is hope these potential BCAs can provide long lasting  
364 protection of grapevine against GTDs because they share the same host.

365  
366 Acknowledgements

367 This research received funding from the American Vineyard Foundation.

368 Competing Interests: The Authors declare no conflict of interest.

369  
370 References

371  
372 Aroca A., Gramaje D., Armengol J., Jose G.-J., Rapaso R., 2010. Evaluation of the grapevine  
373 nursery propagation process as a source of *Phaeoacremonium spp.* and *Phaeomoniella*  
374 *chlamydospora* and occurrence of trunk disease pathogens in rootstock mother vines in Spain.  
375 *European Journal of Plant Pathology* 126: 165–174.

376  
377 Barata A., Malfeito-Ferreira M., Loureiro V., 2012. The microbial ecology of wine grape berries.  
378 *International Journal of Food Microbiology* 153: 243–259.

379  
380 Bertsch C., Ramirez-Suero M., Magnin-Robert M., Larignon P., Chong J., Abou-Mansour E.,  
381 Spagnolo A., Clement C., Fontaine F., 2013. Grapevine trunk diseases: complex and still poorly  
382 understood: *Grapevine trunk diseases*. *Plant Pathology* 62: 243–265.

383  
384 Billones-Baaijens R., Jones E. E., Ridgway H. J., Jaspers M. V., 2013. Virulence Affected by  
385 Assay Parameters during Grapevine Pathogenicity Studies with Botryosphaeriaceae Nursery  
386 Isolates. *Plant Pathology* 62: 1214–25.

387  
388 Bruisson, S., Zufferey, M., L'haridon, F., Trutmann, E., Anand, A., Dutartre, A., De Vrieze, Am.,  
389 Weisskopf, L., 2019. Endophytes and Epiphytes From the Grapevine Leaf Microbiome as  
390 Potential Biocontrol Agents Against Phytopathogens. *Frontiers in Microbiology* 10: 1-17.

391  
392 Carbone I., Kohn L. M., 1999. A method for designing primer sets for speciation studies in  
393 filamentous ascomycetes. *Mycologia* 91: 553–556.

394  
395 Cawoy H., Bettiol W., Fickers P., Ongena M., 2011. Bacillus-based biological control of plant  
396 diseases, pesticides in the modern world. In: *Pesticides in the Modern World-Pesticides Use and*  
397 *Management* (Stoytcheva, M, ed.), Intech: 273-283.

398  
399 Chambers, S., Scott E., 1995. In vitro antagonism of *Phytophthora cinnamomi* and *P. citricola* by  
400 *Trichoderma* species and *Gliocladium virens*. *Journal of Phytopathology* 143: 471–477.

- 401  
402 Choudray D. K., Johri B. N., 2009. Interactions of *Bacillus spp.* and plants – With special reference  
403 to induced systemic resistance (ISR). *Microbiological Research* 164: 593–513.
- 404  
405 Claydon, N., Allan, M.; Hanson, J. R. , Avent, A. G., 1987. Antifungal alkyl pyrones of  
406 *Trichoderma harzianum*. *Transactions of the British Mycological Society* 88: 503–513.
- 407  
408 Deyett, E., Rolshausen, P. E., Temporal Dynamics of the Sap Microbiome of Grapevine Under  
409 High Pierce’s Disease Pressure. 2019. *Frontiers in Plant Science* 10: 1-15.
- 410  
411 Di Marco, S., Osti, F. , Roberti, R., Calzarano, F., Cesari, A., 2002. Attivita` di specie di  
412 *Trichoderma* nei confronti di *Phaeomoniella chlamydospora*, patogeno associato al mal dell’esca  
413 della vite. *Atti Giornate Fitopatologiche* 419–424.
- 414  
415 Di Marco, S., Osti, F., Cesari, A., 2004. Experiments on the control of esca by *Trichoderma*.  
416 *Phytopathologia Mediterranea*. 43: 108–115.
- 417  
418 Dos Reis Almeida, F. B., Cerqueria, F. M., do Nascimento Silva, R., Ulhoa, C. J., Lima, A. L.,  
419 2007. Mycoparasitism studies of *Trichoderma harzianum* strains against *Rhizoctonia solani*:  
420 evaluation of coiling and hydrolytic enzyme production. *Biotechnology Letters* 29: 1189–1193.
- 421  
422 Ferreira, J. H. S., Mathee, F. N., Thomas, A. C., 1991. Biological Control of *Eutypa lata* on  
423 Grapevine by an Antagonistic Strain of *Bacillus subtilis*. *Ecology and Epidemiology* 81: 283–287.
- 424  
425 Gilbert, J. A., Van der Lelie, D., Zorraonaindia, I., 2014. Microbial terroir for wine grapes. *PNAS*  
426 111: 5–6.
- 427  
428 Glass, N. L., Donaldson, G. C., 1995. Development of Primer Sets Designed for Use with the PCR  
429 To Amplify Conserved Genes from Filamentous Ascomycetes. *Applied and Environmental*  
430 *Microbiology* 61: 1323–1330.
- 431  
432 Gotor-Vila, A., Teixado, N., Di Francesco, A., Usall, J., Ugolini, L., Torres, R., Mari, M., 2017.  
433 Antifungal effect of volatile organic compounds produced by *Bacillus amyloliquefaciens* CPA-8  
434 against fruit pathogen decays of cherry. *Food Microbiology* 64: 219–225.
- 435  
436 Gramaje, D., Armengol, J., 2011. Fungal Trunk Pathogens in the Grapevine Propagation Process:  
437 Potential Inoculum Sources, Detection, Identification, and Management Strategies. *Plant Disease*  
438 95: 1040–1055.
- 439  
440 Gramaje, D., Úrbez-Torres, J. R., Sosnowski, M. R., 2018. Managing Grapevine Trunk Diseases  
441 With Respect to Etiology and Epidemiology: Current Strategies and Future Prospects. *Plant*  
442 *Disease* 102: 12–39.
- 443  
444 Grube, M., Schmid, F., Berg, G., 2011 Black fungi and associated bacterial communities in the  
445 phyllosphere of grapevine. *Fungal Biology* 115: 978–986.
- 446

- 447 Gubler, W. D., Rolshausen, P. E., Trouillas, F. P., Urbez Torres, J. R., Voegel, T., 2005. Grapevine  
448 trunk diseases in California. *Practical Winery and Vineyard*. **2005**.  
449
- 450 Haidar, R., Deschamps, A., Roudet, J., Calvo-Garrido, C., Bruez, E., Rey, P., Fermaud, M., 2016.  
451 Multi-organ screening of efficient bacterial control agents against two major pathogens of  
452 grapevine. *Biological Control* 92: 55–65.  
453
- 454 Halleen, F.; Crous, P.; Petrini, O. 2003. Fungi associated with healthy grapevine cuttings in  
455 nurseries, with special reference to pathogens involved in the decline of young vines. *Australasian*  
456 *Plant Pathology* 32: 47–52.  
457
- 458 Halleen, F., Fourie, P. H., Lombard, P. J., 2010. Protection of grapevine pruning wounds against  
459 *Eutypa lata* by biological and chemical methods. *South African Journal for Enology and*  
460 *Viticulture* 31: 125–132.  
461
- 462 Hardoim, P. R., Can Overbeek, L. S., Berg, G., Pirttila, A. M., Compant, S., Campisano, A.,  
463 Doring, M., Sessitsch, A., 2015. The hidden world within plants: ecological and evolutionary  
464 considerations for defining functioning of microbial endophytes. *Microbiology and Molecular*  
465 *Biology Reviews* 79: 293–320.  
466
- 467 Harman, G. E., 2006. Overview of Mechanisms and Uses of *Trichoderma* spp. *Phytopathology*  
468 96: 190–194.  
469
- 470 Heimpel, G. E., Mills, N., 2017. *Biological Control - Ecology and Applications*. Cambridge  
471 University Press, Cambridge, UK, 1 pp.  
472
- 473 Idris, H. A., Labuschagne, N., Korsten, L., 2007. Screening rhizobacteria for biological control of  
474 *Fusarium* root and crown rot of sorghum in Ethiopia. *Biological Control* 40: 97–106.  
475
- 476 Kotze, C., Van Niekerk, J., Mostert, L., Halleen, F., Fourie, P., 2011. Evaluation of biocontrol  
477 agents for grapevine pruning wound protection against trunk pathogen infection. *Phytopathologia*  
478 *Mediterranea* 50: 247–263.  
479
- 480 John, S., Scott, E., Wicks, T. J., Hunt, J., 2004 Interactions between *Eutypa lata* and *Trichoderma*  
481 *harzianum*. *Phytopathologia Mediterranea* 43: 95–104.  
482
- 483 John, S., Wicks, T. J., Hunt, J., Lorimer, M., Oakey, H., Scott, E. S., 2005. Protection of grapevine  
484 pruning wounds from infection by *Eutypa lata* using *Trichoderma harzianum* and *Fusarium*  
485 *lateritium*. *Australasian Plant Pathology* 34: 569.  
486
- 487 John, S., Wicks, T. J., Hunt, J. S., Scott, E. S., 2008. Colonisation of grapevine wood by  
488 *Trichoderma harzianum* and *Eutypa lata*. *Australian Journal of Grape and Wine Research* 14: 18–  
489 24.  
490

- 491 Kaplan, J., Travadon., R., Cooper, M., Hilis, V., Lubell, M., Baumgartner, K., 2016. Identifying  
492 economic hurdles to early adoption of preventative practices: The case of trunk diseases in  
493 California winegrape vineyards. *Wine Economics and Policy* 5: 127–141.
- 494  
495 Kexiang, G., Xiaoguang, L., Yonghong, L., Tianbo, Z., Shuliang, W., 2002. Potential of  
496 *Trichoderma harzianum* and *T. atroviride* to control *Botryosphaeria berengeriana* f. sp. *piricola*,  
497 the cause of apple ring rot. *Journal of Phytopathology* 150: 271–276.
- 498  
499 Kotze, C., 2019. Biological control of the grapevine trunk disease pathogens: pruning wound  
500 protection. MSc. thesis, *Stellenbosch University*, Stellenbosch, South Africa, 2008, SUNScholar  
501 Research Repository, <https://scholar.sun.ac.za/handle/10019.1/2117>, (accessed on 13<sup>th</sup> October  
502 2019).
- 503  
504 Kucuk, C., Kivanc, M., 2004. *In Vitro* Antifungal Activity of Strains of *Trichoderma harzianum*.  
505 *Turkish Journal of Biology* 28: 111–115.
- 506  
507 Lu, J. J., Perng, C. L., Lee, S. Y., Wan, C. C., 2000. Use of PCR with Universal Primers and  
508 Restriction Endonuclease Digestions for Detection and Identification of Common Bacterial  
509 Pathogens in Cerebrospinal Fluid. *Journal of Clinical Microbiology* 38: 2076–2080.
- 510  
511 Luque, J., Elena, G., Garcia-Figueres, F., Reyes, J., Barrios, G., Legorburu, F.J., 2014. Natural  
512 infections of pruning wounds by fungal trunk pathogens in mature grapevines in Catalonia  
513 (Northeast Spain). *Australian Journal of Grape and Wine Research* 20: 134–143.
- 514  
515 Martinez-Diz, M. D. P., Diaz-Losada, E., Andres-Sodupe, M., Bujanda, R., Maldonadao-  
516 Gonzalez, M. M., Ojeda, S., Yacoub, A., Rey, P., Gramaje, D., 2020. Field evaluation of biocontrol  
517 agents against black-foot and Petri diseases of grapevine. *Pest Management. Science*.
- 518  
519 Martini, M., Musetti, R., Grisan, R., Polizzotto, R., Borselli, S., Pavan, F., Osler, R., 2009. DNA-  
520 dependent detection of the grapevine fungal endophytes *Aureobasidium pullulans* and *Epicoccum*  
521 *nigrum*. *Plant Disease* 93: 993–998.
- 522  
523 Mondello, V., Songy, A., Battison, E., Pinto, C., Coppin, C., Trotel-Aziz, P., Clement, C., Mugnai,  
524 L., Fontaine, F., 2018. Grapevine Trunk Diseases: A Review of Fifteen Years of Trials for Their  
525 Control with Chemicals and Biocontrol Agents. *Plant Disease* 102: 1189–1217.
- 526  
527 Mukherjee, P. K., Horwitz, B. A., Herrera-Estrella, A., Schmoll, M., Kenerley, C. M., 2013.  
528 *Trichoderma* Research in the Genome Era. *Annual. Review of Phytopathology* 51: 105–129.
- 529  
530 Mugnai, L., Graniti, A., Surico, G., 1999. Esca (black measles) and brown wood-streaking: two  
531 old and elusive diseases of grapevines. *Plant Disease* 83: 404–418.
- 532  
533 Munkvold, G., Duthie, J., Marois, J., 1994. Reductions in yield and vegetative growth of  
534 grapevines due to *Euytpa* dieback. *Phytopathology* 84: 186–192.
- 535



- 536 Mutawila, C., Halleen, F., Mostert, L., 2015. Development of benzimidazole resistant Trichoderma  
537 strains for the integration of chemical and biocontrol methods of grapevine pruning wound  
538 protection. *BioControl* 60: 387–399.
- 539  
540 Otoguro, M., Suzuki, S., 2018. Status and future of disease protection and grape berry quality  
541 alteration by micro-organisms in viticulture. *Letters in Applied Microbiology* 67: 106–112.
- 542  
543 Pascoe, I., Cottral, E., 2000. Developments in grapevine trunk diseases research in Australia.  
544 *Phytopathologia Mediterranea* 39: 68–75.
- 545  
546 Pinto, C., Custodio, V., Nunes, M., Songy, A., Rabenoelina, F., Courteaux, B., Clement, C.,  
547 Catarina Gomes, A., Fontaine, F., 2018. Understand the Potential Role of Aureobasidium  
548 pullulans, a Resident Microorganism From Grapevine, to Prevent the Infection Caused by  
549 *Diplodia seriata*. *Frontiers in Microbiology* 9: 1-15.
- 550  
551 Pinto, C., Gomes, A. C., 2016. Vitis vinifera microbiome: from basic research to technological  
552 development. *BioControl* 61: 243–256.
- 553  
554 Pitt, W. M., Úrbez-Torres, J. R., Trouillas, F. P., 2015. Dothiorella and Spencermartinsia, new  
555 species and records from grapevines in Australia. *Australasian Plant Pathology* 44: 43–56.
- 556  
557 Rolshausen, P. E., Trouillas, F. P., Gubler, W. D., 2004. Identification of Eutypa lata by PCR-  
558 RFLP. *Plant Disease* 88: 925–929.
- 559  
560 Rolshausen, P. E., Akgul, D. S., Perez, R., Eskalen, A., Gispert, C., 2013. First report of wood  
561 canker caused by Neoscytalidium dimidiatum on grapevine in California. *Plant Disease* 97: 1511.
- 562  
563 Rooney, A. P., Price, N. P. J., Erhardt, C., Swezey, J. L., Bannan, J. D., 2009. Phylogeny and  
564 molecular taxonomy of the *Bacillus subtilis* species complex and description of *Bacillus subtilis*  
565 subsp. inaquosorum subsp. nov. *International Journal of Systematic and Evolutionary*  
566 *Microbiology* 59: 2429–2435.
- 567  
568 Sabate, J., Cano, J., Esteve-Zarzoso, B., Guillamón, J. M., 2002. Isolation and identification of  
569 yeasts associated with vineyard and winery by RFLP analysis of ribosomal genes and  
570 mitochondrial DNA. *Microbiological Research* 157: 267–274.
- 571  
572 Schmidt, C. S., Lorenz, D., Wolf, G. A., 2001. Biological control of the grapevine dieback fungus  
573 *Eutypa lata* I: Screening of bacterial antagonists. *Journal of Phytopathology* 149: 427–435.
- 574  
575 Siebert, J. B., 2001. *Eutypa*: the economic toll in vineyards. *Wines and Vines* 82: 50–56.
- 576  
577 Silva-Valderrama, I., Toapanta, D., de los Angeles Miccono, M., Lolas, M., Diaz, G. A., Cantu,  
578 D., Castro, A., 2020. Biocontrol potential of grapevine endophytes against grapevine trunk  
579 pathogens. *bioRxiv*
- 580

581 Strobel, G., Daisy, B., 2003. Bioprospecting for Microbial Endophytes and Their Natural Products.  
582 *Microbiology and Molecular. Biology Reviews* 67: 491–502.

583  
584 Trouillas, F. P., Úrbez-Torres, J. R., Gubler, W. D., 2010. Diversity of diatrypaceous fungi  
585 associated with grapevine canker diseases in California. *Mycologia* 102: 319–336.

586  
587 Úrbez Torres, J. R., Leavitt, T. M., Voegel, T. M., Gubler, W. D., 2006. Identification and  
588 distribution of *Botryosphaeria* spp. associated with grapevine cankers in California. *Plant Disease*.  
589 90: 1490–1503.

590  
591 Úrbez-Torres, J. R., 2011. The status of *Botryosphaeriaceae* species infecting grapevines.  
592 *Phytopathologia Mediterranea* 50: 5–45.

593 Úrbez-Torres J. R., Tomaselli E., Pollard-Flamand J., Boule J., Gerin D., Pollastro S., 2020.  
594 Characterization of *Trichoderma* isolates from southern Italy, and their potential biocontrol  
595 activity against grapevine trunk disease fungi. *Phytopathologia Mediterranea* 59(3): 425-439.

596 Waite, H., Morton, L., 2007. Hot Water Treatment, Trunk Diseases and Other Critical Factors in  
597 the Production of High-Quality Grapevine Planting Material. *Phytopathologia Mediterranea* 46:  
598 5–17.

599  
600 West, E. R., Cother, E. J., Steel, C. C., Ash, G. J., 2010. The characterization and diversity of  
601 bacterial endophytes of grapevine. *Canadian Journal of Microbiology* 56: 209–216.

602  
603 White, T. J., Bruns, T., Lee, S. W., Taylor, J. W., 1990. Amplification and Direct Sequencing of  
604 Fungal Ribosomal RNA Genes for Phylogenetics. In: *PCR Protocols: A Guide to Methods and*  
605 *Applications*. (M.A. Innis, D.H. Gelfand, J.J. Sninsky, T.J. White, ed.), Academic Press,  
606 Cambridge, MA, USA, 317.

607  
608 Yang, T., Groenewald, Z., Cheewangkoon, R., Jami, F., Abdollahzadeh, J., Lombard, L., Crous,  
609 P.W., 2017. Families, genera, and species of *Botryosphaeriales*. *Fungal Biology* 121: 322–346.

610  
611 Zanzotto, A., Morrioni, M., 2016. Major Biocontrol Studies and Measures Against Fungal and  
612 Oomycete Pathogens and Grapevines. In: *Biocontrol of Major Grapevine Diseases: Leading*  
613 *Research*. (S. Compant, F. Mathieu, ed.), CAB International, Wallingford, UK 1-34.

614

615

616

617

618

619

620

621

622

623

624 **Table 1.** Source of isolated microorganisms and ITS/16S identification

625  
626

| Isolate  | Source                                | Genus                      |
|----------|---------------------------------------|----------------------------|
| UCD 8193 | Grapevine cane tissue                 | <i>Aureobasidium</i> (ITS) |
| UCD 8248 | Grapevine cane tissue                 | <i>Aureobasidium</i> (ITS) |
| UCD 8302 | Grapevine sap, collected immediately  | <i>Aureobasidium</i> (ITS) |
| UCD 8176 | Grapevine cane tissue                 | <i>Aureobasidium</i> (ITS) |
| UCD 8174 | Grapevine sap, collected immediately  | <i>Aureobasidium</i> (ITS) |
| UCD 8196 | Grapevine sap, collected immediately  | <i>Aureobasidium</i> (ITS) |
| UCD 8170 | Grapevine sap, collected immediately  | <i>Aureobasidium</i> (ITS) |
| UCD 8344 | Grapevine cane tissue                 | <i>Aureobasidium</i> (ITS) |
| UCD 8189 | Grapevine sap, collected immediately  | <i>Aureobasidium</i> (ITS) |
| UCD 8745 | Grapevine sap, collected after 7 days | <i>Bacillus</i> (16S)      |
| UCD 8347 | Grapevine cane pith                   | <i>Bacillus</i> (16S)      |
| UCD 8368 | Grapevine cane tissue                 | <i>Trichoderma</i> (ITS)   |
| UCD 8717 | Grapevine sap, collected after 7 days | <i>Trichoderma</i> (ITS)   |

627

628 **Figure 1.** Preliminary *In vitro dual culture* evaluation of isolated micro-organisms ability to inhibit  
629 radial mycelial growth of the grapevine trunk disease pathogens (A) *Neofusicoccum parvum* and  
630 (B) *Eutypa lata*. The percentage of inhibition of pathogen mycelial growth was calculated using  
631 the formula: % inhibition = [(C-T)/C] x 100 (49) where C is the radius in mm of the pathogen  
632 when plated by itself and T is the radius of the pathogen when plated with a grapevine isolate.  
633 Values represent the average of ten replicates ± standard error. Asterisk (\*) indicates significant  
634 inhibition in comparison with a control (Dunnett's test  $P \leq 0.05$ ).

635  
636

637

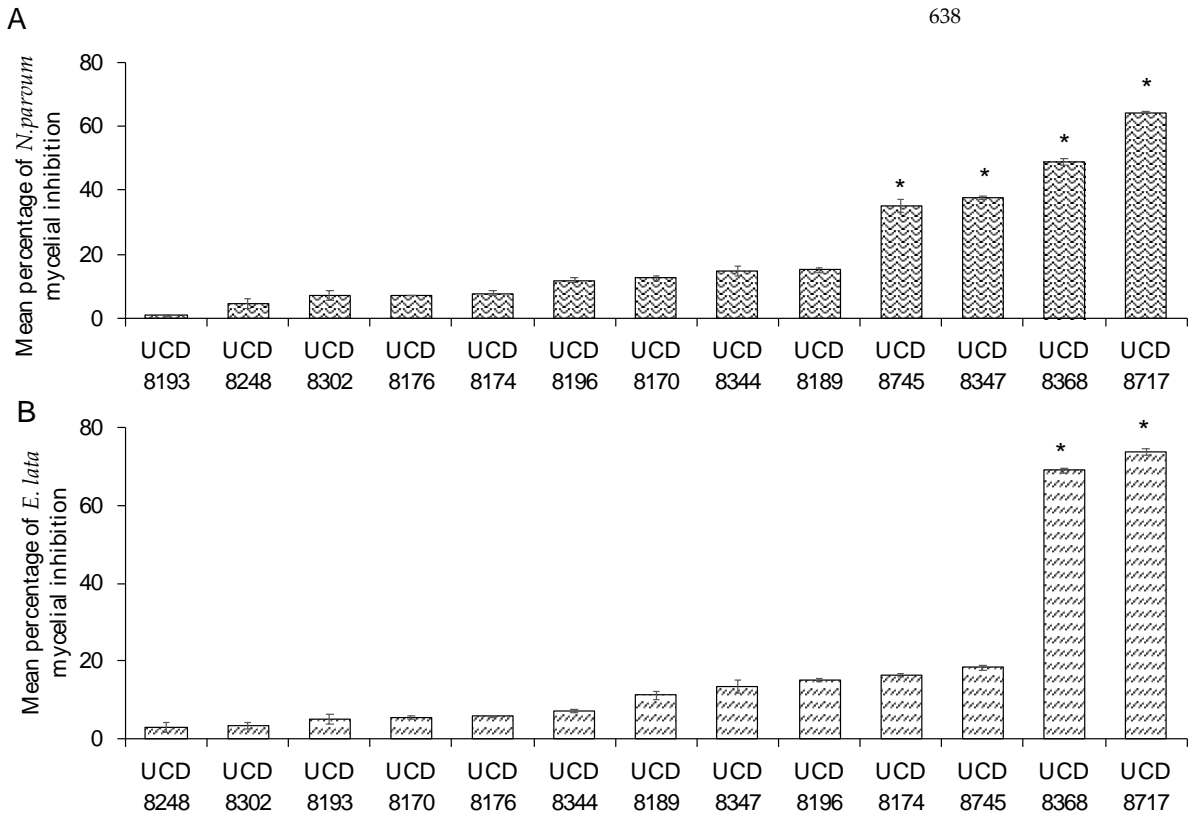

639

640

641

642

643

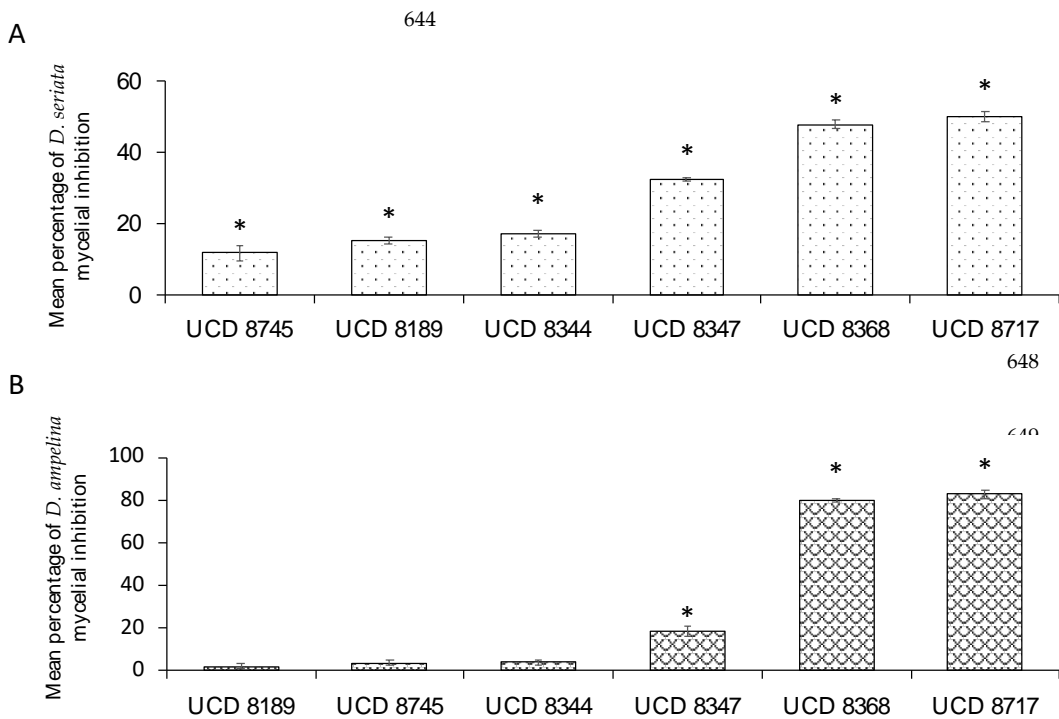



653 **Figure 2.** *In vitro* dual culture evaluation of selected micro-organisms ability to inhibit radial  
654 mycelial growth of the grapevine trunk disease pathogens (A) *Diplodia seriata* and (B) *Diaporthe*  
655 *ampelina*. The percentage of inhibition of pathogen mycelial growth was calculated using the  
656 formula: % inhibition =  $[(C-T)/C] \times 100$  (49) where C is the radius in mm of the pathogen when  
657 plated by itself and T is the radius of the pathogen when plated with a grapevine isolate. Values  
658 represent the average of ten replicates  $\pm$  standard error. Asterisk (\*) indicates significant  
659 inhibition in comparison with a control (Dunnett's test  $P \leq 0.05$ ).

660

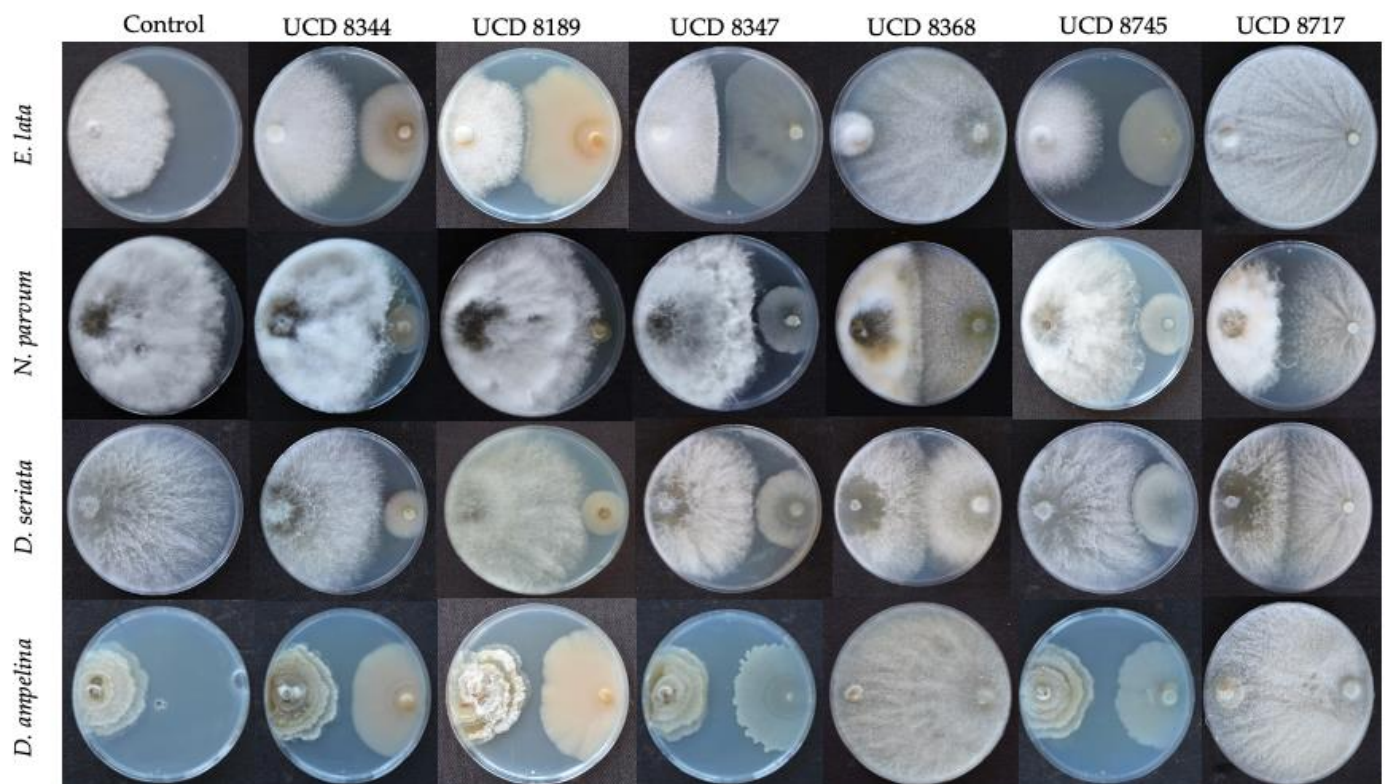

661 **Figure 3.** Representative visual summary of In vitro dual culture evaluation of selected isolates  
662 ability to inhibit radial mycelial growth of selected grapevine trunk disease pathogens.

663

664

665

666

667

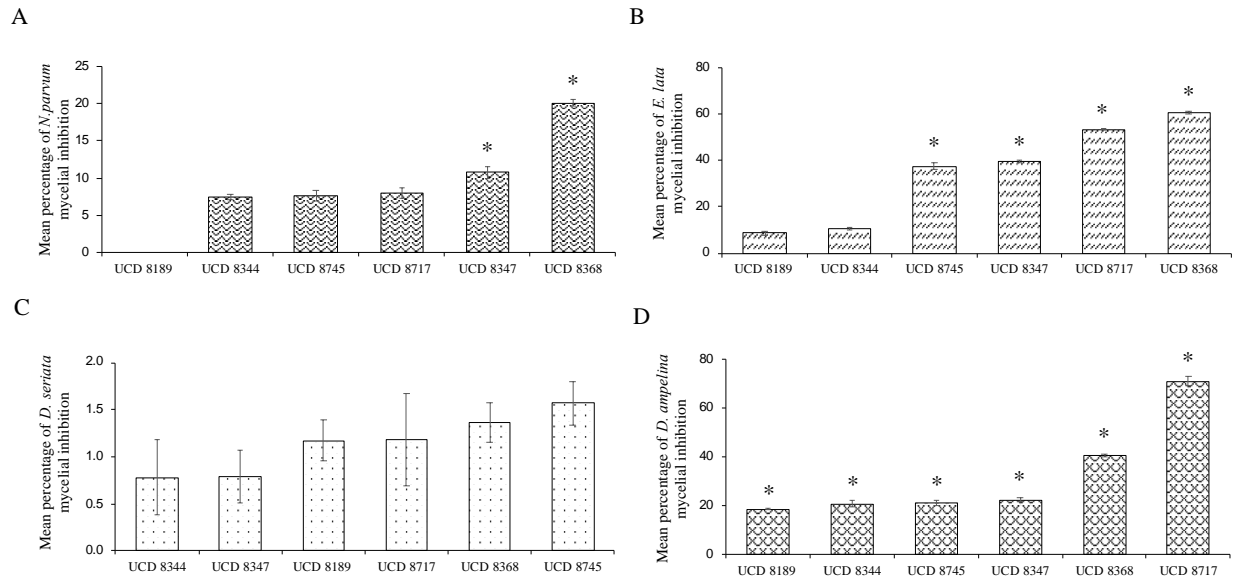

668

669 **Figure 4.** *In vitro* volatile evaluation of selected micro-organisms ability to inhibit radial mycelial  
670 growth of the grapevine trunk disease pathogens (**A**) *Neofusicoccum parvum*, (**B**) *Eutypa lata*, (**C**)  
671 *Diplodia seriata* and (**D**) *Diaporthe ampelina* using the sealed-base-plates method (50) with  
672 modifications . The percentage of inhibition of pathogen mycelial growth was calculated using the  
673 formula: % inhibition = [(C-T)/C] x 100 (49) where C is the radius in mm of the pathogen when  
674 plated by itself and T is the radius of the pathogen when plated with a grapevine isolate. Values  
675 represent the average of ten replicates  $\pm$  standard error. Asterisk (\*) indicates significant  
676 inhibition in comparison with a control (Dunnett's test  $P \leq 0.05$ ).

677

678

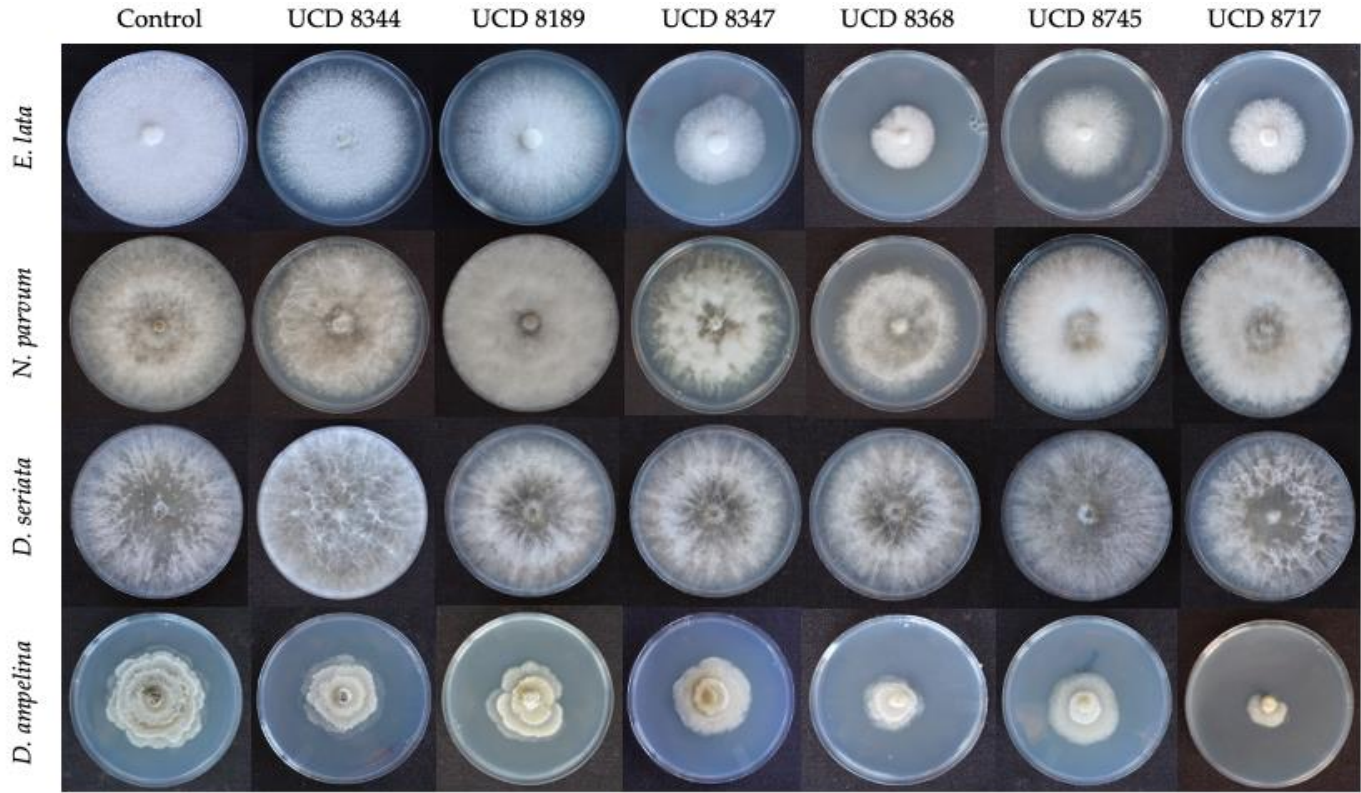

679 **Figure 5.** Representative visual Summary of *In vitro volatile* evaluation of selected micro-  
680 organisms ability to inhibit radial mycelial growth of the grapevine trunk disease pathogens

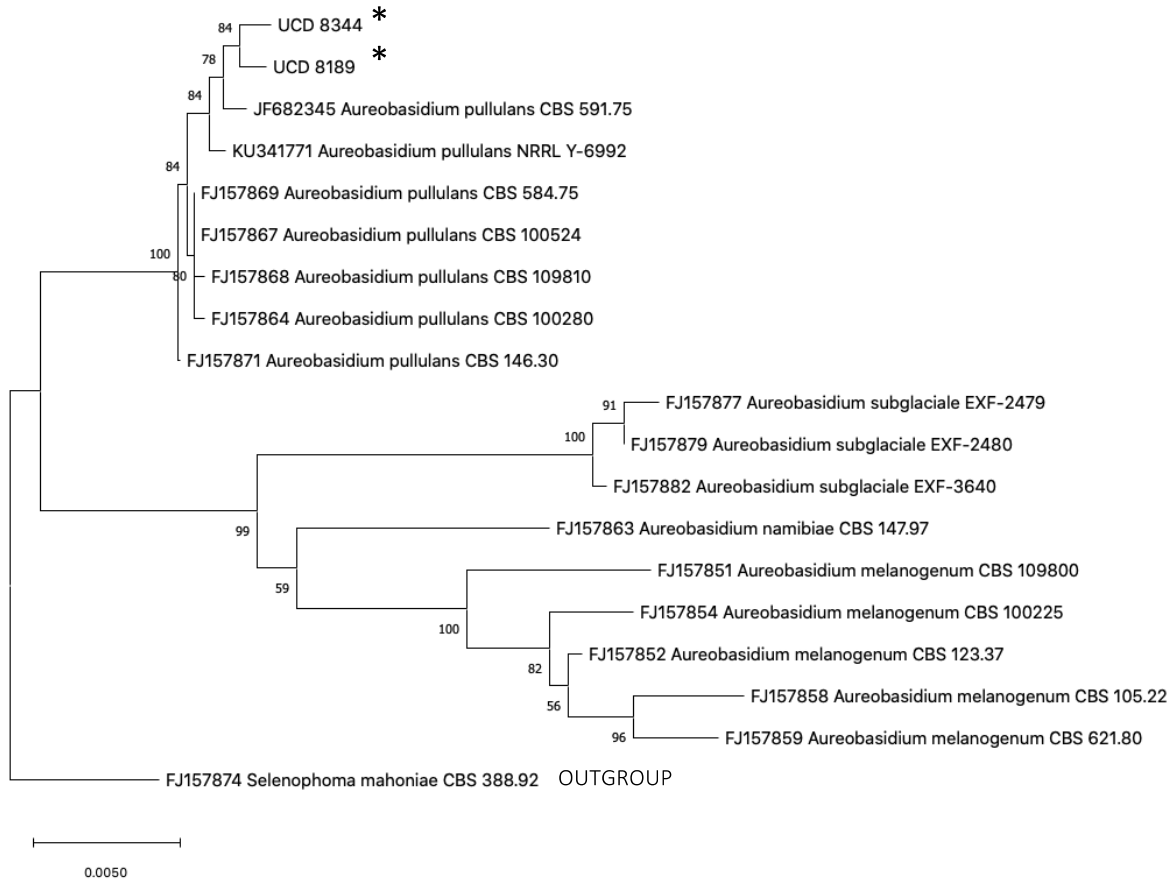

681  
682 **Figure 6.** Maximum parsimony phylogenetic tree of UCD 8344 and UCD 8189 based on a  
683 multigene data set of internal transcribed spacer rDNA (ITS) and  $\beta$ 1-tubulin. Bootstrap support  
684 for the maximum-likelihood analysis is given at each node (1000 replicates). Asterix (\*) indicates  
685 isolates evaluated in this study. FJ150872 *Selenopoma mahoniae* was used as an outgroup.



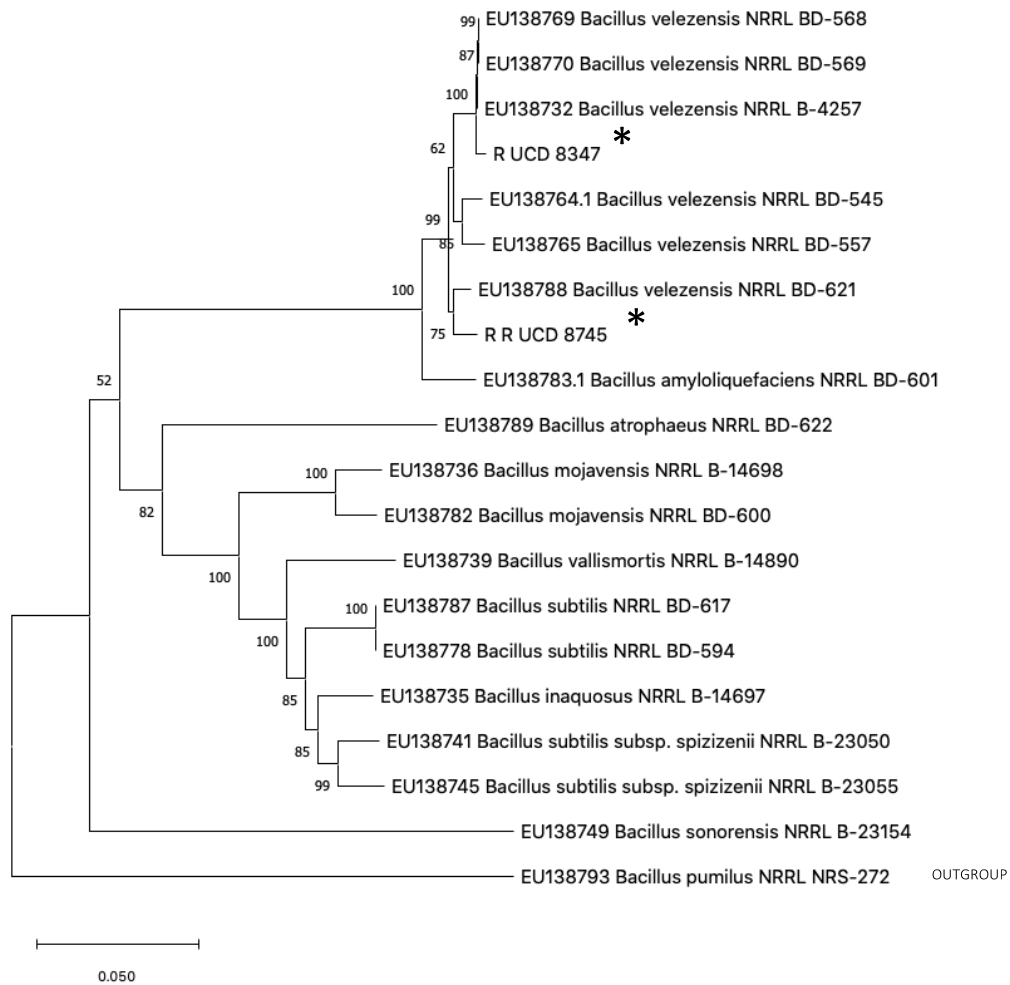

686  
687 **Figure 7.** Maximum parsimony phylogenetic tree of UCD 8347 and UCD 8745 based on a  
688 multigene data set of purine biosynthesis (*purH*) and RNA polymerase subunit B (*rpoB*). Bootstrap  
689 support for the maximum-likelihood analysis is given at each node (1000 replicates). Asterix (\*)  
690 indicates isolates evaluated in this study. EU138793 *Bacillus pumilus* was used as an outgroup.

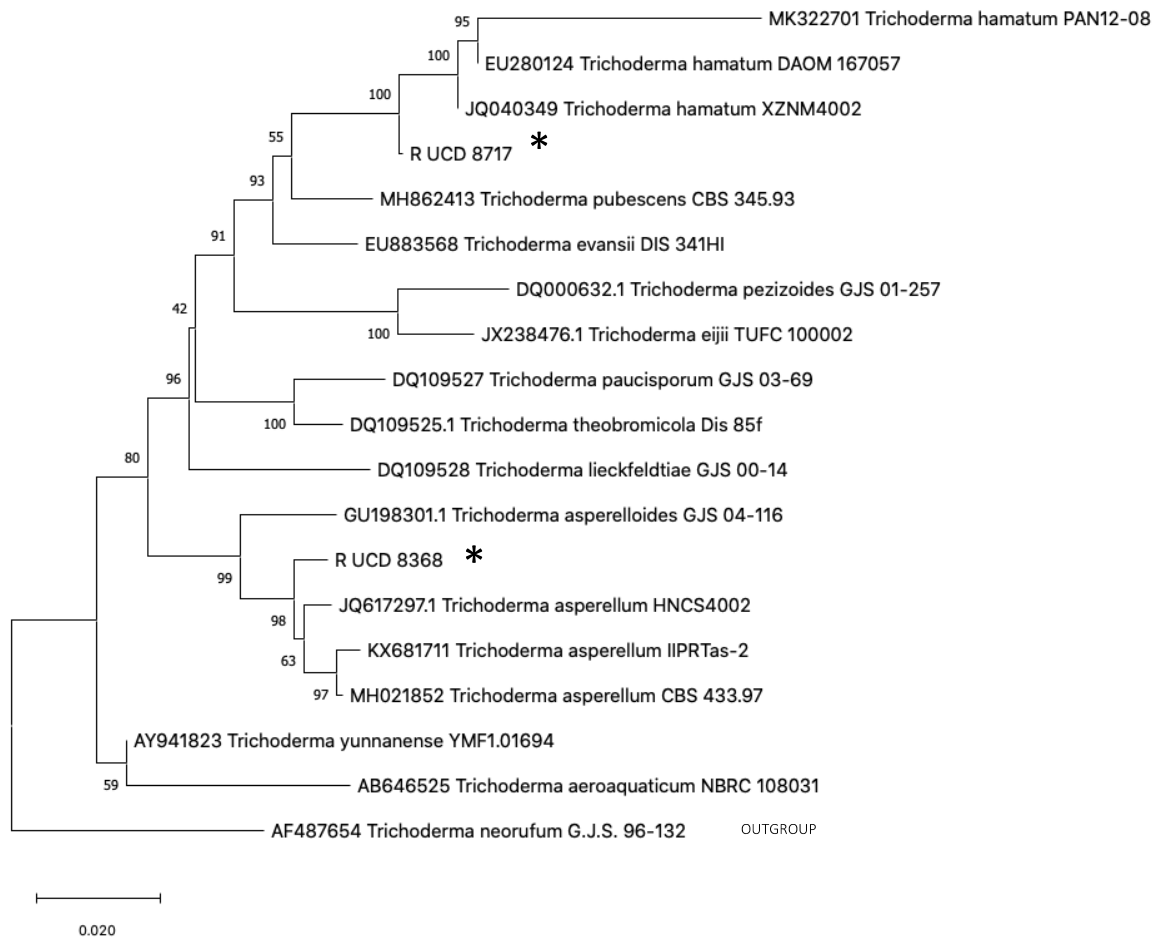

691  
692 **Figure 8.** Maximum parsimony phylogenetic tree of UCD 8368 and UCD 8717 based on a  
693 multigene alignment of the *Trichoderma Hamatum/Asperellum* clade using internal transcribed  
694 spacer rDNA (ITS), and translation elongation factor 1-alpha (TEF1). Bootstrap support for the  
695 maximum-likelihood analysis is given at each node (1000 replicates). Asterix (\*) indicates  
696 subcultures evaluated in this study. AF487654 *Trichoderma neorufum* was used as an outgroup.  
697
